# Supplementary figures and images for: Perioperative Electroacupuncture Can Accelerate the Recovery of Gastrointestinal Function in Cancer Patients Undergoing Pancreatectomy or Gastrectomy: A Randomized Controlled Trial
Source: Hindawi journal article supplement (doi:10.1155/2021/5594263), 2021-03-31

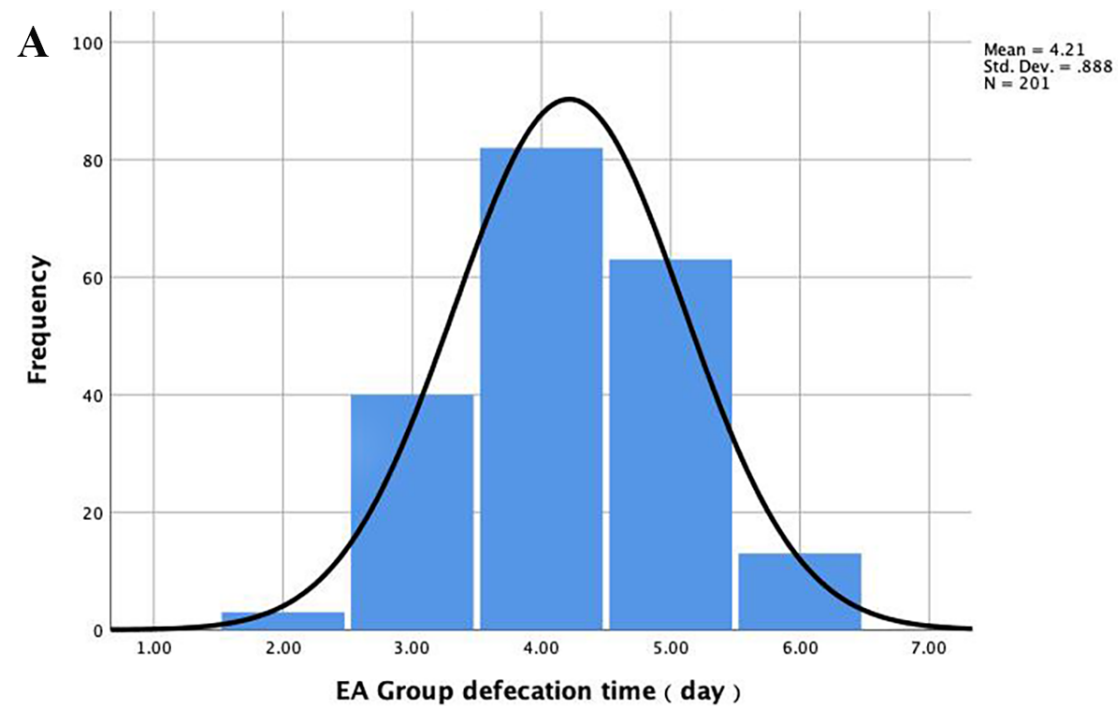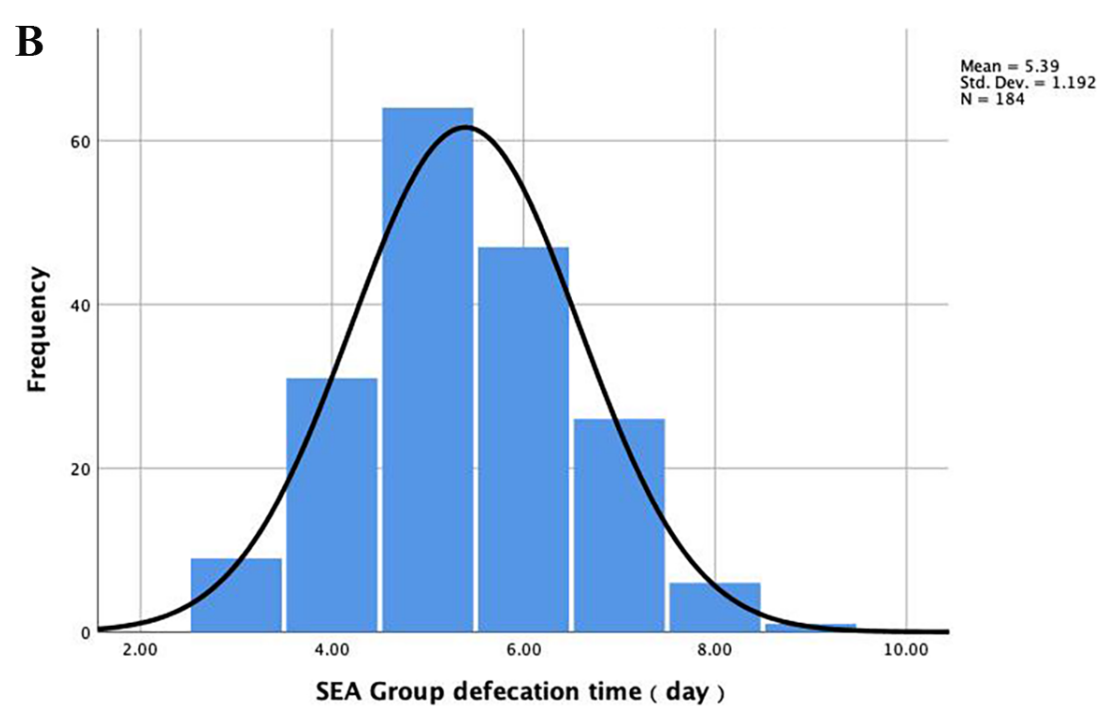

Supplement: f1 [file 5594263.f1.zip]

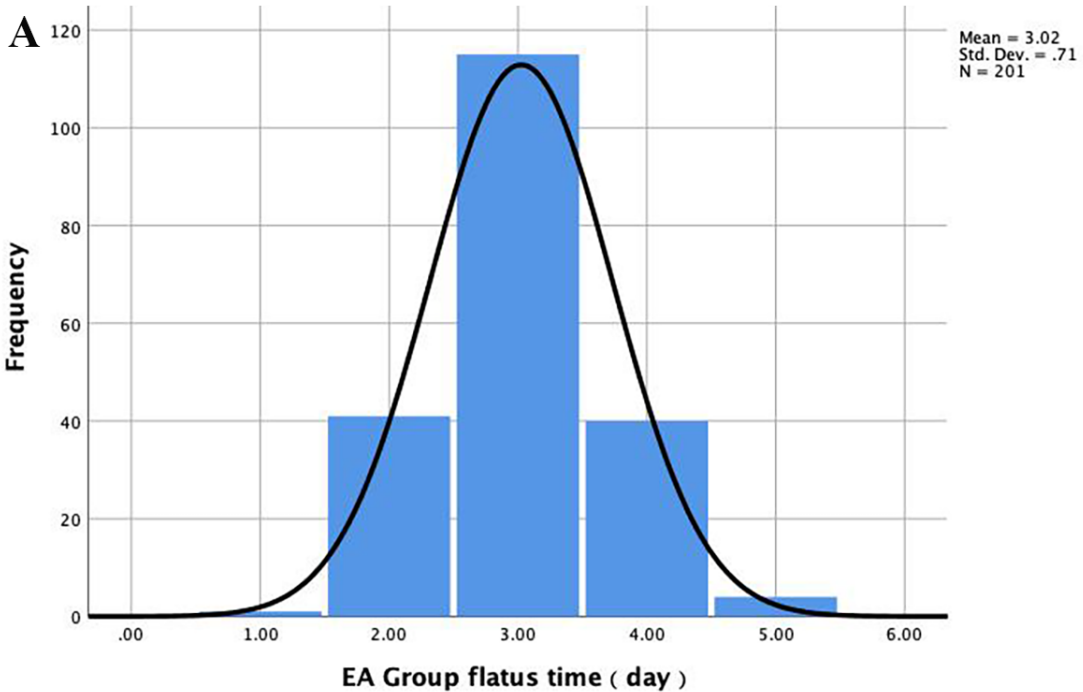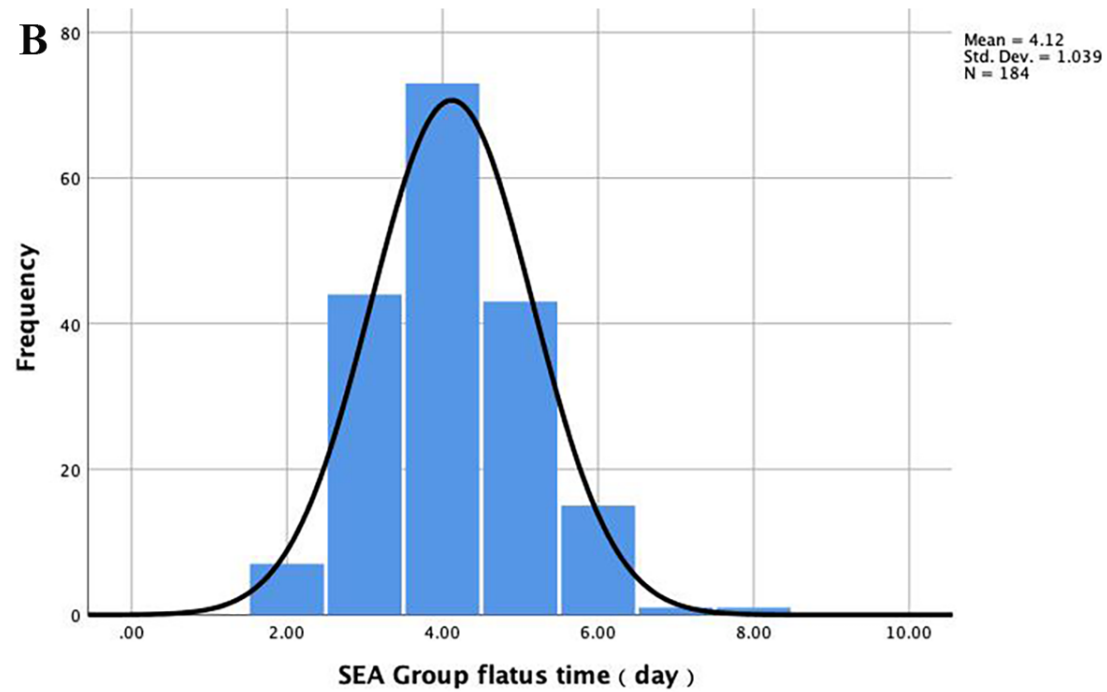

Supplement: f1 [file 5594263.f1.zip]
